# Supplementary material for: Targeting of the Pilosebaceous Follicle by Liquid Crystal Nanocarriers: In Vitro and In Vivo Effects of the Entrapped Minoxidil
Source: Pharmaceutics. 2020 Nov 22;12(11):1127. doi: 10.3390/pharmaceutics12111127 (PMC7700400; doi:10.3390/pharmaceutics12111127)
Supplement: Supplementary file 1 [file pharmaceutics-12-01127-s001.pdf]

# Supplementary Materials: Targeting of the Pilosebaceous Follicle by Liquid Crystal Nanocarriers: in Vitro and in Vivo Effects of the Entrapped Minoxidil

Massimo Fresta, Antonia Mancuso, Maria Chiara Cristiano, Konrad Urbanek, Felisa Cilurzo, Donato Cosco, Michelangelo Iannone and Donatella Paolino\*

Figure S1 shows a confocal micrograph of the fluorescent labeled LCNs. The nanosystems were characterized by a highly organized biconcave structure, very similar to the red blood cells.

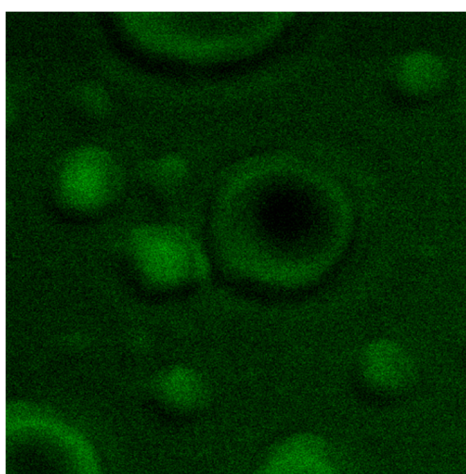

**Figure S1.** Confocal micrograph of fluorescently-labeled LCNs.

Figure S2 presents a micrograph of the skin of untreated rats in order to demonstrate the very low autofluorescence that occurs when the nanocarriers have not been administered.

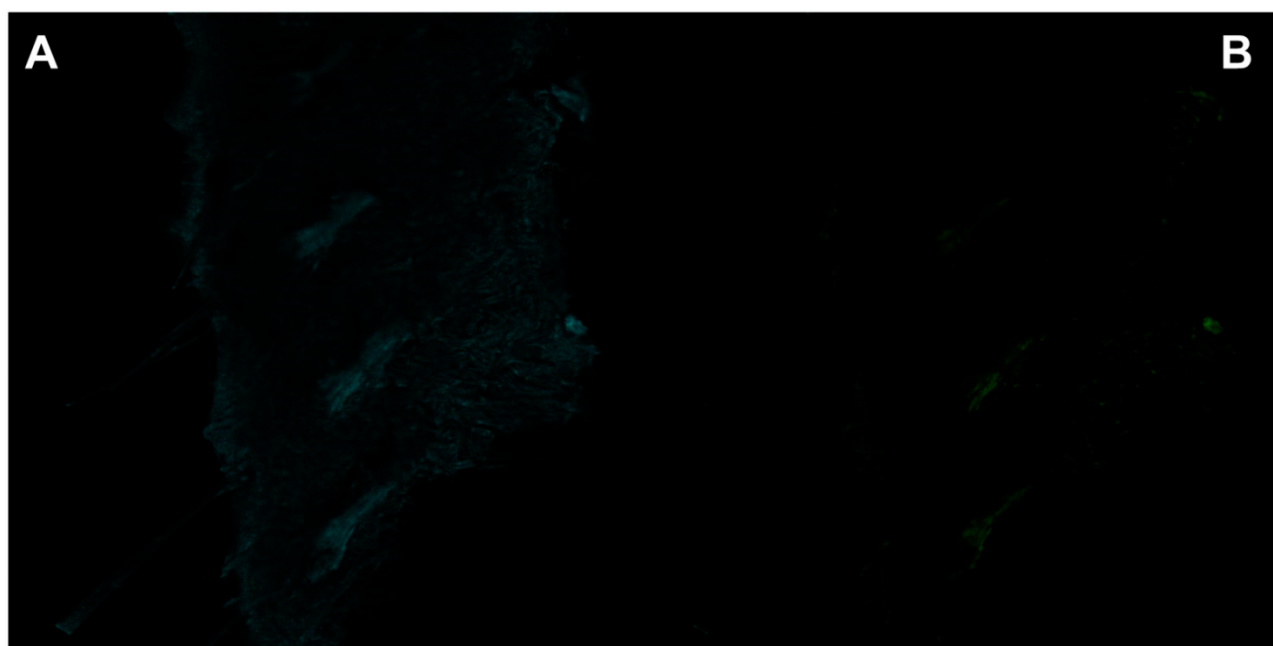

**Figure S2.** CLSM micrograph of the skin of untreated rats. **A:** transmittance; **B:** FITC channel.

Figure S3 reports the percentage increase of active delivery efficiency obtained for minoxidil-loaded nanocarriers after 1 h of treatment. As can be seen, minoxidil-loaded LCNs reached values of ~600%, compared to their free active counterparts. The percentage values recorded for minoxidil-loaded transfersomes® and SLNs were about half of those obtained from minoxidil-loaded LCNs. The obtained results highlight the better ability of LCNs to deliver active substances at the follicular site, in comparison to both the hydro-alcoholic solution of minoxidil and to the other active-loaded analyzed carriers, i.e., SLNs and transfersomes®.

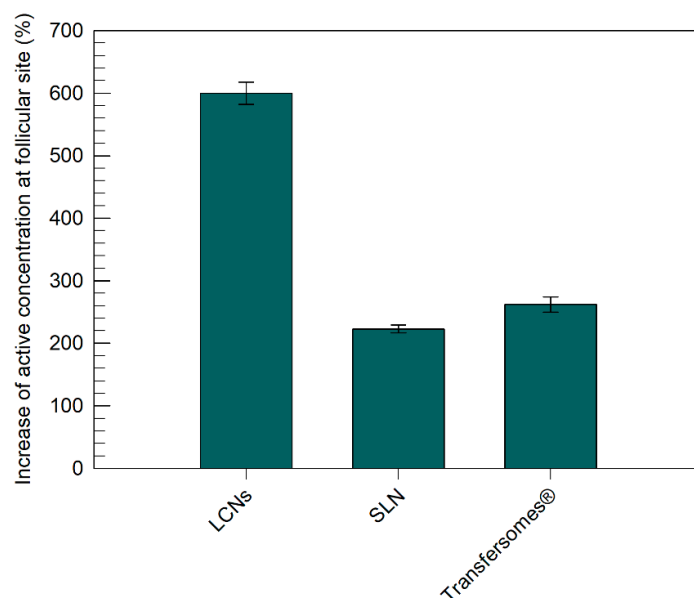

**Figure S3.** Increase of active delivery efficiency, measured as percentage increase of active concentration at follicular site after 1 h of treatment (the free active measurement was used as reference). The data obtained for minoxidil-loaded liquid crystal nanocarriers were statistically significant with respect to that obtained from the free active.

Figure S4 shows the overall concentration of minoxidil at different skin layers after 24 h of treatment. Minoxidil-loaded LCNs showed percentage values significantly greater with respect to those obtained from the free active and the other active-loaded analyzed carriers.

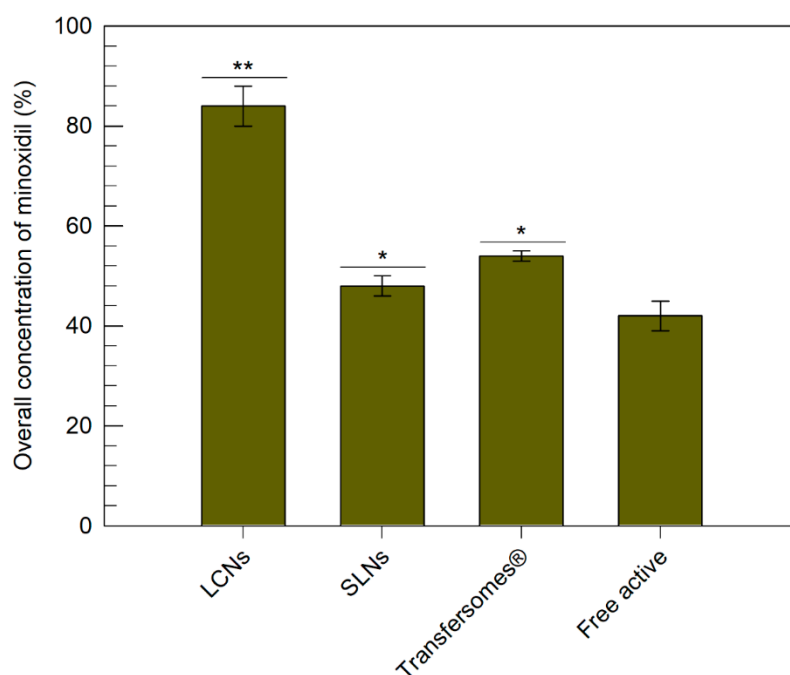

**Figure S4.** Permeation studies at different skin layers. Overall concentration of minoxidil measured after 24 h from application. Results were expressed as percentage of the initial dosage applied. The data obtained for minoxidil-loaded LCNs were statistically significant with respect to those obtained from the free active (\*  $p < 0.05$ ; \*\*  $p < 0.001$ ).
